# Supplementary material for: Biomolecular analysis of the Epigravettian human remains from Riparo Tagliente in northern Italy
Source: Commun Biol. 2024 Oct 30;7:1415. doi: 10.1038/s42003-024-06979-9 (PMC11526120; doi:10.1038/s42003-024-06979-9)
Supplement: Supplementary file 2 — Supplementary Data [file 42003_2024_6979_MOESM2_ESM.xlsx]

## Sheet: Supplementary Data 1
					Supplementary Data 1: 14C Dating
Site Name	Submitter Number	Archaeological Context	Species	Pretreatment Code	samples taken	collagen		Graphite code	d13C	d15N	N%	C%	C:N	AMS Lab Code	14C Age	1s Err	% of modern 14C contamination considering MAMS-27188 the correct date	Cal BP from - to	Cal BP from - to	Reference	Mean (m±1s)
					[mg]	[mg]	[%]											0.683	0.954
Riparo Tagliente	1b	Epigravettian	H. sapiens	BRA-6804	556	50.3	9.04676	B.AGE-491	-18.7		17.14	48.93	2.8554	MAMS 62622.1.1	13510	39.911	0.007	16360-16210	16460-16130	This paper	16290±80
Riparo Tagliente	1	Epigravettian	H. sapiens	At ORAU Lab				OxA-10672						OxA-10672	13190	90	0.014	15980-15700	16130-15570	Gazzoni et al. 2013	15840±140
Riparo Tagliente	2	Epigravettian	H. sapiens	R-EVA1606	425.7	39.9	9.3728	MAMS-27188	-19.489	11.471	15.22	44.87	3.44	MAMS-27188	13790	60	0	16870-16600	16980-16500	Bortolini et al. 2021	16740±120

## Sheet: Supplementary Data 2
Supplementary Data 2: Stable isotopes
Country/Region	Site	Lab code	Species	Piece	Excavation n°	Level	Culture	Collagen yield	Ccoll	Ncoll	C:Ncoll	d13Ccoll	d15Ncoll	14C Age	1s Err	14C reference	14C source	13C15N source
								(%)	(%)	(%)		(‰)	(‰)
N Italy	Riparo Tagliente	RT1	Homo sapiens	Rib	Tagliente1	13	Late Epigravettian	10.59	36.1	12.8	3.3	-18.4	13	13190	90	OxA-10672	Stuart & Lister, 2011	Gazzoni et al. 2013
N Italy	Riparo Tagliente	MA-236227	Homo sapiens	Right femur	Tagliente1	13	Late Epigravettian	9.04676	44.13	15.9	3.23805	-18.6	13.64	13510	39.911	MAMS-62622.1.1	this work	this work
N Italy	Riparo Tagliente	R-EVA1606	Homo sapiens	Lower left 1st molar root	Tagliente2	outside shelter	Late Epigravettian	9.4	44.9	15.2	3.4	-19.5	11.5	13790	60	MAMS-27188	Bortolini et al., 2021	Oxilia et al. 2021
N Italy	Riparo Tagliente	RT11	Vulpes vulpes	Metatarsal		13	Late Epigravettian	12.4	36.9	13.1	3.3	-19.3	9.4
N Italy	Riparo Tagliente	RT2	Capra ibex	Humerus		13	Late Epigravettian	1.68	28.8	11.2	3	-18.9	1.2
N Italy	Riparo Tagliente	RT3	Capra ibex	Humerus		13	Late Epigravettian	6.87	34.8	12.3	3.3	-19.1	2.5
N Italy	Riparo Tagliente	RT4	Cervus elaphus	Metatarsal		13	Late Epigravettian	5.23	34.2	12.7	3.1	-20	2.1
N Italy	Riparo Tagliente	RT5	Cervus elaphus	Tibia		13	Late Epigravettian	3.71	32.2	11.5	3.2	-20.5	2
N Italy	Riparo Tagliente	RT6	Capreolus capreolus	Metacarpal		13	Late Epigravettian	4.5	33.5	11.9	3.3	-20.5	5
N Italy	Riparo Tagliente	RT7	Rupicapra rupicapra	Metatarsal		13	Late Epigravettian	8.56	34	12.4	3.2	-18.4	2.7
N Italy	Riparo Tagliente	RT8	Bos/Bison	Metacarpal		13	Late Epigravettian	4.91	34.4	12.2	3.3	-19.6	5.8
N Italy	Riparo Tagliente	RT9	Marmota marmota	Ulna		13	Late Epigravettian	2.35	31.7	11.2	3.3	-19.8	4.8
N Italy	Riparo Tagliente	RT10	Marmota marmota	Radius		13	Late Epigravettian	3.13	31.9	11.2	3.3	-20.6	4.2
N Italy	Riparo Tagliente	RT12	Sus scrofa	Mandible		13	Late Epigravettian	6.85	34	12	3.3	-19.4	5
S Italy	Grotta del Romito	LTL3034A	Homo sapiens	Femur or humerus	Romito 9	E10	Evolved Epigravettian	4.5	42	15.2	3.2	-18.9	12.4	13915	70	LTL3034A	Craig et al. 2010	Craig et al. 2010
S Italy	Grotta del Romito		Capra ibex	Bone	1100	E10	Evolved Epigravettian	1.6	46.8	16.7	3.3	-19.6	4.1					Craig et al. 2010
S Italy	Grotta del Romito		Capra ibex	Bone	1088	E10	Evolved Epigravettian	8.1	48.8	17.9	3.2	-19.5	5.2					Craig et al. 2010
S Italy	Grotta del Romito		Capra ibex	Bone	1092	E10	Evolved Epigravettian	3.1	47.8	17.4	3.2	-19	4.5					Craig et al. 2010
S Italy	Grotta del Romito		Cervus elaphus	Bone	1099	E10	Evolved Epigravettian	4.4	42.3	15.2	3.2	-20.2	5.2					Craig et al. 2010
S Italy	Grotta del Romito		Cervus elaphus	Bone	1097	E10	Evolved Epigravettian	4	48.7	17.6	3.2	-19.6	4.6					Craig et al. 2010
S Italy	Grotta del Romito		Bos primigenius	Bone	1095	E10	Evolved Epigravettian	3.3	51.9	18.6	3.2	-19.7	5.1					Craig et al. 2010
Croatia (Istria)	Šandalja II	SDL-24	Esox lucius	Bone	567	B/d	Epigravettian	0.6	41	13.7	3.49148	-24.1	9.1					Richards et al 2015
Croatia (Istria)	Šandalja II	SDL-22	Esox lucius	Bone	1126	B/d	Epigravettian	1	36.3	12.2	3.47131	-22.6	9.2					Richards et al 2015
Croatia (Istria)	Šandalja II	SDL-23	Esox lucius	Bone	1390	B/d	Epigravettian	0.8	30.7	10.6	3.37893	-23.7	8.5					Richards et al 2015
Croatia (Istria)	Šandalja II	SDL-25	Esox lucius	Bone	1327	B/d	Epigravettian	0.3	32.9	11.2	3.42708	-22.7	9.3					Richards et al 2015
Technical note from the Curt-Engelhorn-Center for Archaeometry in Mannheim, Germany (CEZA):
The sample MAMS-62622.1.1 was combusted using a commercial off-the-shelf elemental analyzer, a Vario Isotope Select (Elementar Analysensysteme GmbH, Langenselbold, Germany) in CNS mode. We work in CNS mode be default. Due to the higher reactor temperature, tricky samples are better, i.e. more completely, combusted than in CN mode. The reactor tube filling was based on "Vario Isotope Select Quick …

## Sheet: Supplementary Data 3
Supplementary Data 3: Pairwise Mismatch Rate (PMR)
ID1	ID2	nSNPs	nmismatch	pmismatch		Comparative Samples	Source
R11.SG	AC16	526698	102541	0.19469		Villabruna	Fu et al. 2016
R15.SG	AC16	785861	153062	0.19477		R11.SG	Antonio et al. 2019
R7.SG	AC16	787425	153799	0.19532		R15.SG	Antonio et al. 2019
STO001.A0101	AC16	696272	136323	0.19579		R7.SG	Antonio et al. 2019
Villabruna	AC16	687849	142861	0.20769		STO001	Posth et al. 2023
AC16	I2158_v2	234603	46182	0.19685		AC16	Posth et al. 2023
PA12	I2158_v2	204431	50613	0.24758		PA12	Posth et al. 2023
PRD001.A0101	I2158_v2	74071	15686	0.21177		PRD001	Posth et al. 2023
R11.SG	I2158_v2	183066	36562	0.19972		Tagliente2	Posth et al. 2023
R15.SG	I2158_v2	272967	54038	0.19797		UZZ096	Yu et al. 2022
R7.SG	I2158_v2	273460	54106	0.19786		I2158_v2	Mathieson et al. 2018
STO001.A0101	I2158_v2	255172	47085	0.18452		UZZ5054	Yu et al. 2022
Tagliente2	I2158_v2	150109	30800	0.20518		Mbuti	Mallick et al. 2016
Tagliente2_pmd	I2158_v2	61848	12281	0.19857
UZZ096	I2158_v2	21138	3422	0.16189
Villabruna	I2158_v2	259598	54727	0.21081
AC16	PA12	562273	139408	0.24794
R11.SG	PA12	441970	109919	0.2487
R15.SG	PA12	657640	164065	0.24948
R7.SG	PA12	658828	164451	0.24961
STO001.A0101	PA12	591410	146324	0.24742
Villabruna	PA12	584680	146102	0.24988
AC16	PRD001.A0101	192141	40707	0.21186
PA12	PRD001.A0101	168127	41414	0.24633
R11.SG	PRD001.A0101	148554	31728	0.21358
R15.SG	PRD001.A0101	222149	47366	0.21322
R7.SG	PRD001.A0101	222474	47337	0.21278
STO001.A0101	PRD001.A0101	202748	43927	0.21666
Villabruna	PRD001.A0101	204591	44593	0.21796
Villabruna	R11.SG	562858	119769	0.21279
R11.SG	R15.SG	704142	137996	0.19598
Villabruna	R15.SG	840943	179221	0.21312
R11.SG	R7.SG	705903	133901	0.18969
R15.SG	R7.SG	1052028	202680	0.19266
Villabruna	R7.SG	842540	178743	0.21215
R15.SG	STO001.A0101	879164	176927	0.20124
R7.SG	STO001.A0101	881062	175864	0.1996
Villabruna	STO001.A0101	758122	160145	0.21124
AC16	Tagliente1	125705	25979	0.20667
I2158_v2	Tagliente1	53578	11239	0.20977
PA12	Tagliente1	109271	27464	0.25134
PRD001.A0101	Tagliente1	39545	8649	0.21871
R11.SG	Tagliente1	97359	20633	0.21193
R15.SG	Tagliente1	145598	31003	0.21294
R7.SG	Tagliente1	145749	30938	0.21227
STO001.A0101	Tagliente1	136203	29351	0.21549
Tagliente2	Tagliente1	80449	9314	0.11578
Tagliente2_pmd	Tagliente1	33479	3667	0.10953
UZZ096	Tagliente1	11255	2300	0.20435
UZZ5054	Tagliente1	121874	25445	0.20878
Villabruna	Tagliente1	140058	30402	0.21707
AC16	Tagliente1_pmd	5119	988	0.19301
I2158_v2	Tagliente1_pmd	2270	480	0.21145
PA12	Tagliente1_pmd	4548	1133	0.24912
PRD001.A0101	Tagliente1_pmd	1662	366	0.22022
R11.SG	Tagliente1_pmd	3971	831	0.20927
R15.SG	Tagliente1_pmd	5902	1189	0.20146
R7.SG	Tagliente1_pmd	5915	1208	0.20423
STO001.A0101	Tagliente1_pmd	5615	1226	0.21834
Tagliente2	Tagliente1_pmd	3355	352	0.10492
Tagliente2_pmd	Tagliente1_pmd	1436	145	0.10097
UZZ096	Tagliente1_pmd	479	92	0.19207
UZZ5054	Tagliente1_pmd	4991	987	0.19776
Villabruna	Tagliente1_pmd	5798	1246	0.2149
AC16	Tagliente2	399141	80354	0.20132
PA12	Tagliente2	346160	85633	0.24738
PRD001.A0101	Tagliente2	123122	25912	0.21046
R11.SG	Tagliente2	314906	64608	0.20517
R15.SG	Tagliente2	471341	96798	0.20537
R7.SG	Tagliente2	472067	96594	0.20462
STO001.A0101	Tagliente2	424739	88634	0.20868
Villabruna	Tagliente2	425768	88475	0.2078
AC16	Tagliente2_pmd	158958	31117	0.19576
PA12	Tagliente2_pmd	139500	33683	0.24146
PRD001.A0101	Tagliente2_pmd	51487	10473	0.20341
R11.SG	Tagliente2_pmd	121807	24376	0.20012
R15.SG	Tagliente2_pmd	182598	36537	0.2001
R7.SG	Tagliente2_pmd	182843	36262	0.19832
STO001.A0101	Tagliente2_pmd	166988	33768	0.20222
Villabruna	Tagliente2_pmd	169334	34164	0.20176
AC16	UZZ096	53906	10239	0.18994
PA12	UZZ096	47697	11533	0.2418
PRD001.A0101	UZZ096	17164	3541	0.2063
R11.SG	UZZ096	40918	7939	0.19402
R15.SG	UZZ096	60335	11720	0.19425
R7.SG	UZZ096	60424	11704	0.1937
STO001.A0101	UZZ096	56158	10153	0.18079
Tagliente2	UZZ096	34131	6866	0.20117
Tagliente2_pmd	UZZ096	14028	2724	0.19418
Villabruna	UZZ096	55995	11605	0.20725
AC16	UZZ5054	626525	119151	0.19018
I2158_v2	UZZ5054	227939	34815	0.15274
PA12	UZZ5054	533377	130941	0.24549
PRD001.A0101	UZZ5054	183213	38452	0.20988
R11.SG	UZZ5054	494583	96485	0.19508
R15.SG	UZZ5054	737097	143407	0.19456
R7.SG	UZZ5054	738597	143137	0.1938
STO001.A0101	UZZ5054	661519	117889	0.17821
Tagliente2	UZZ5054	380966	76732	0.20141
Tagliente2_pmd	UZZ5054	152387	29696	0.19487
UZZ096	UZZ5054	52069	8078	0.15514
Villabruna	UZZ5054	655578	135822	0.20718

## Sheet: Supplementary Data 4
Supplementary Data 4: f3-outgroup statistics
A	B	Outgroup	f3	se	Z	nSNPs
Tagliente1	Villabruna	Mbuti.DG	0.374363	0.00508	73.7	94294
Tagliente1	R11.SG	Mbuti.DG	0.378751	0.005478	69.147	65247
Tagliente1	R15.SG	Mbuti.DG	0.379752	0.004992	76.067	97768
Tagliente1	R7.SG	Mbuti.DG	0.383728	0.00502	76.443	97995
Tagliente1	STO001	Mbuti.DG	0.375011	0.004939	75.921	91486
Tagliente1	AC16	Mbuti.DG	0.386269	0.005	77.252	84071
Tagliente1	PA12	Mbuti.DG	0.285476	0.005136	55.588	73651
Tagliente1	PRD001	Mbuti.DG	0.355684	0.007139	49.822	26516
Tagliente1	Tagliente2	Mbuti.DG	0.571285	0.006204	92.081	52577
Tagliente1	Tagliente2_pmd	Mbuti.DG	0.56737	0.00839	67.626	21653
Tagliente1	UZZ096	Mbuti.DG	0.383136	0.012052	31.79	7519
Tagliente1	I2158_v2	Mbuti.DG	0.377237	0.00639	59.033	35844
Tagliente1	UZZ5054	Mbuti.DG	0.38252	0.005245	72.935	81518
Tagliente1_pmd	Tagliente2	Mbuti.DG	0.618782	0.024282	25.484	2172
